# Supplementary material
Source: MDPI journal article supplement (https://www.mdpi.com/2673-9992/14/1/30)
Supplement: s1 [file s1]

# EFFECT OF PRESERVATIVE SOLUTION MODIFIED BY THE ADDITION OF MAGNESIUM AND MANGANESE ON THE NEPHRON FUNCTIONS OF ISOLATED PERFUSED PORCINE KIDNEYS

Aneta Ostróżka-Cieślik<sup>1</sup>, Barbara Dolińska<sup>1,2</sup> and Florian Ryszka<sup>2†</sup>

<sup>1</sup>Department of Pharmaceutical Technology, Faculty of Pharmaceutical Sciences in Sosnowiec, Medical University of Silesia, Kasztanowa 3, 41-200 Sosnowiec, Poland

<sup>2</sup>“Biochefa” Pharmaceutical Research and Production Plant, Kasztanowa 3, 41-200 Sosnowiec, Poland

†In the memory of Professor Florian Ryszka

## 1. Introduction

We present another paper in a series of studies on the effectiveness of preservation solutions modified with bioelements in protecting ischemic organs for transplantation. Bioelements as components of organ perfusion and preservation solutions can potentially increase the efficiency of graft preservation. Macro- and micronutrients are involved in biochemical reactions and metabolic processes of the cell. Many of them exhibit antioxidant properties, protecting against oxidative damage. The aim of this study was to evaluate the effectiveness of manganese ( $Mn^{2+}$ ) and magnesium ( $Mg^{2+}$ ) as components of Biolasol solution.

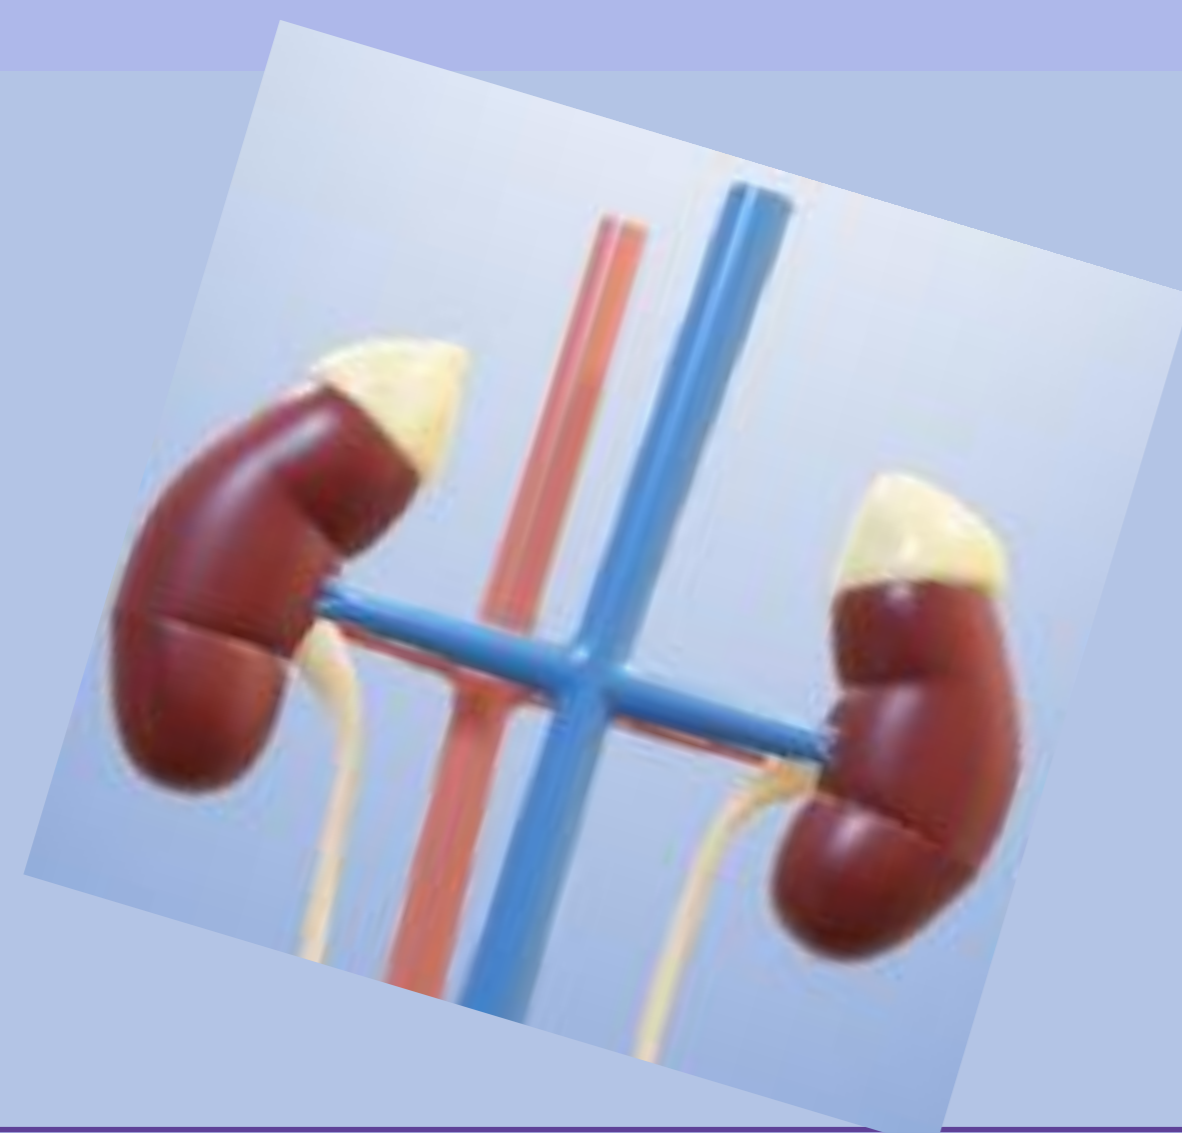

## 2. Materials and Methods

The study was conducted in a model of isolated porcine kidneys collected from Polish Large White pigs. Approval was obtained from II Local Ethics Committee Krakow; number 1046/2013. Kidneys were preserved through static cold storage (SCS) using Biolasol (control) and modified Biolasol (A:  $Mn^{2+}$ / 1  $\mu g/l$ ; B:  $Mg^{2+}$ / 1  $\mu g/l$  and  $Mn^{2+}$ / 1  $\mu g/l$ ). Kidneys were flushed with solutions after 48 hours of storage.

## 3. Results

Potassium, urea, and creatinine concentrations were highest in the Biolasol +  $Mn^{2+}$  group after 48h storage ( $[K^+]$ : up by 50% vs Biolasol and 119% vs Biolasol +  $Mn^{2+}$  +  $Mg^{2+}$ ; urea: up by 18% vs Biolasol and 300% vs Biolasol +  $Mn^{2+}$  +  $Mg^{2+}$ ; creatinine: up by 250% vs Biolasol and 240% vs Biolasol +  $Mn^{2+}$  +  $Mg^{2+}$ ;  $p < 0.05$ ). Protein concentration was lowest in the Biolasol +  $Mn^{2+}$  +  $Mg^{2+}$  group (by 81% vs Biolasol and 67% vs Biolasol +  $Mn^{2+}$ ;  $p < 0.05$ ).

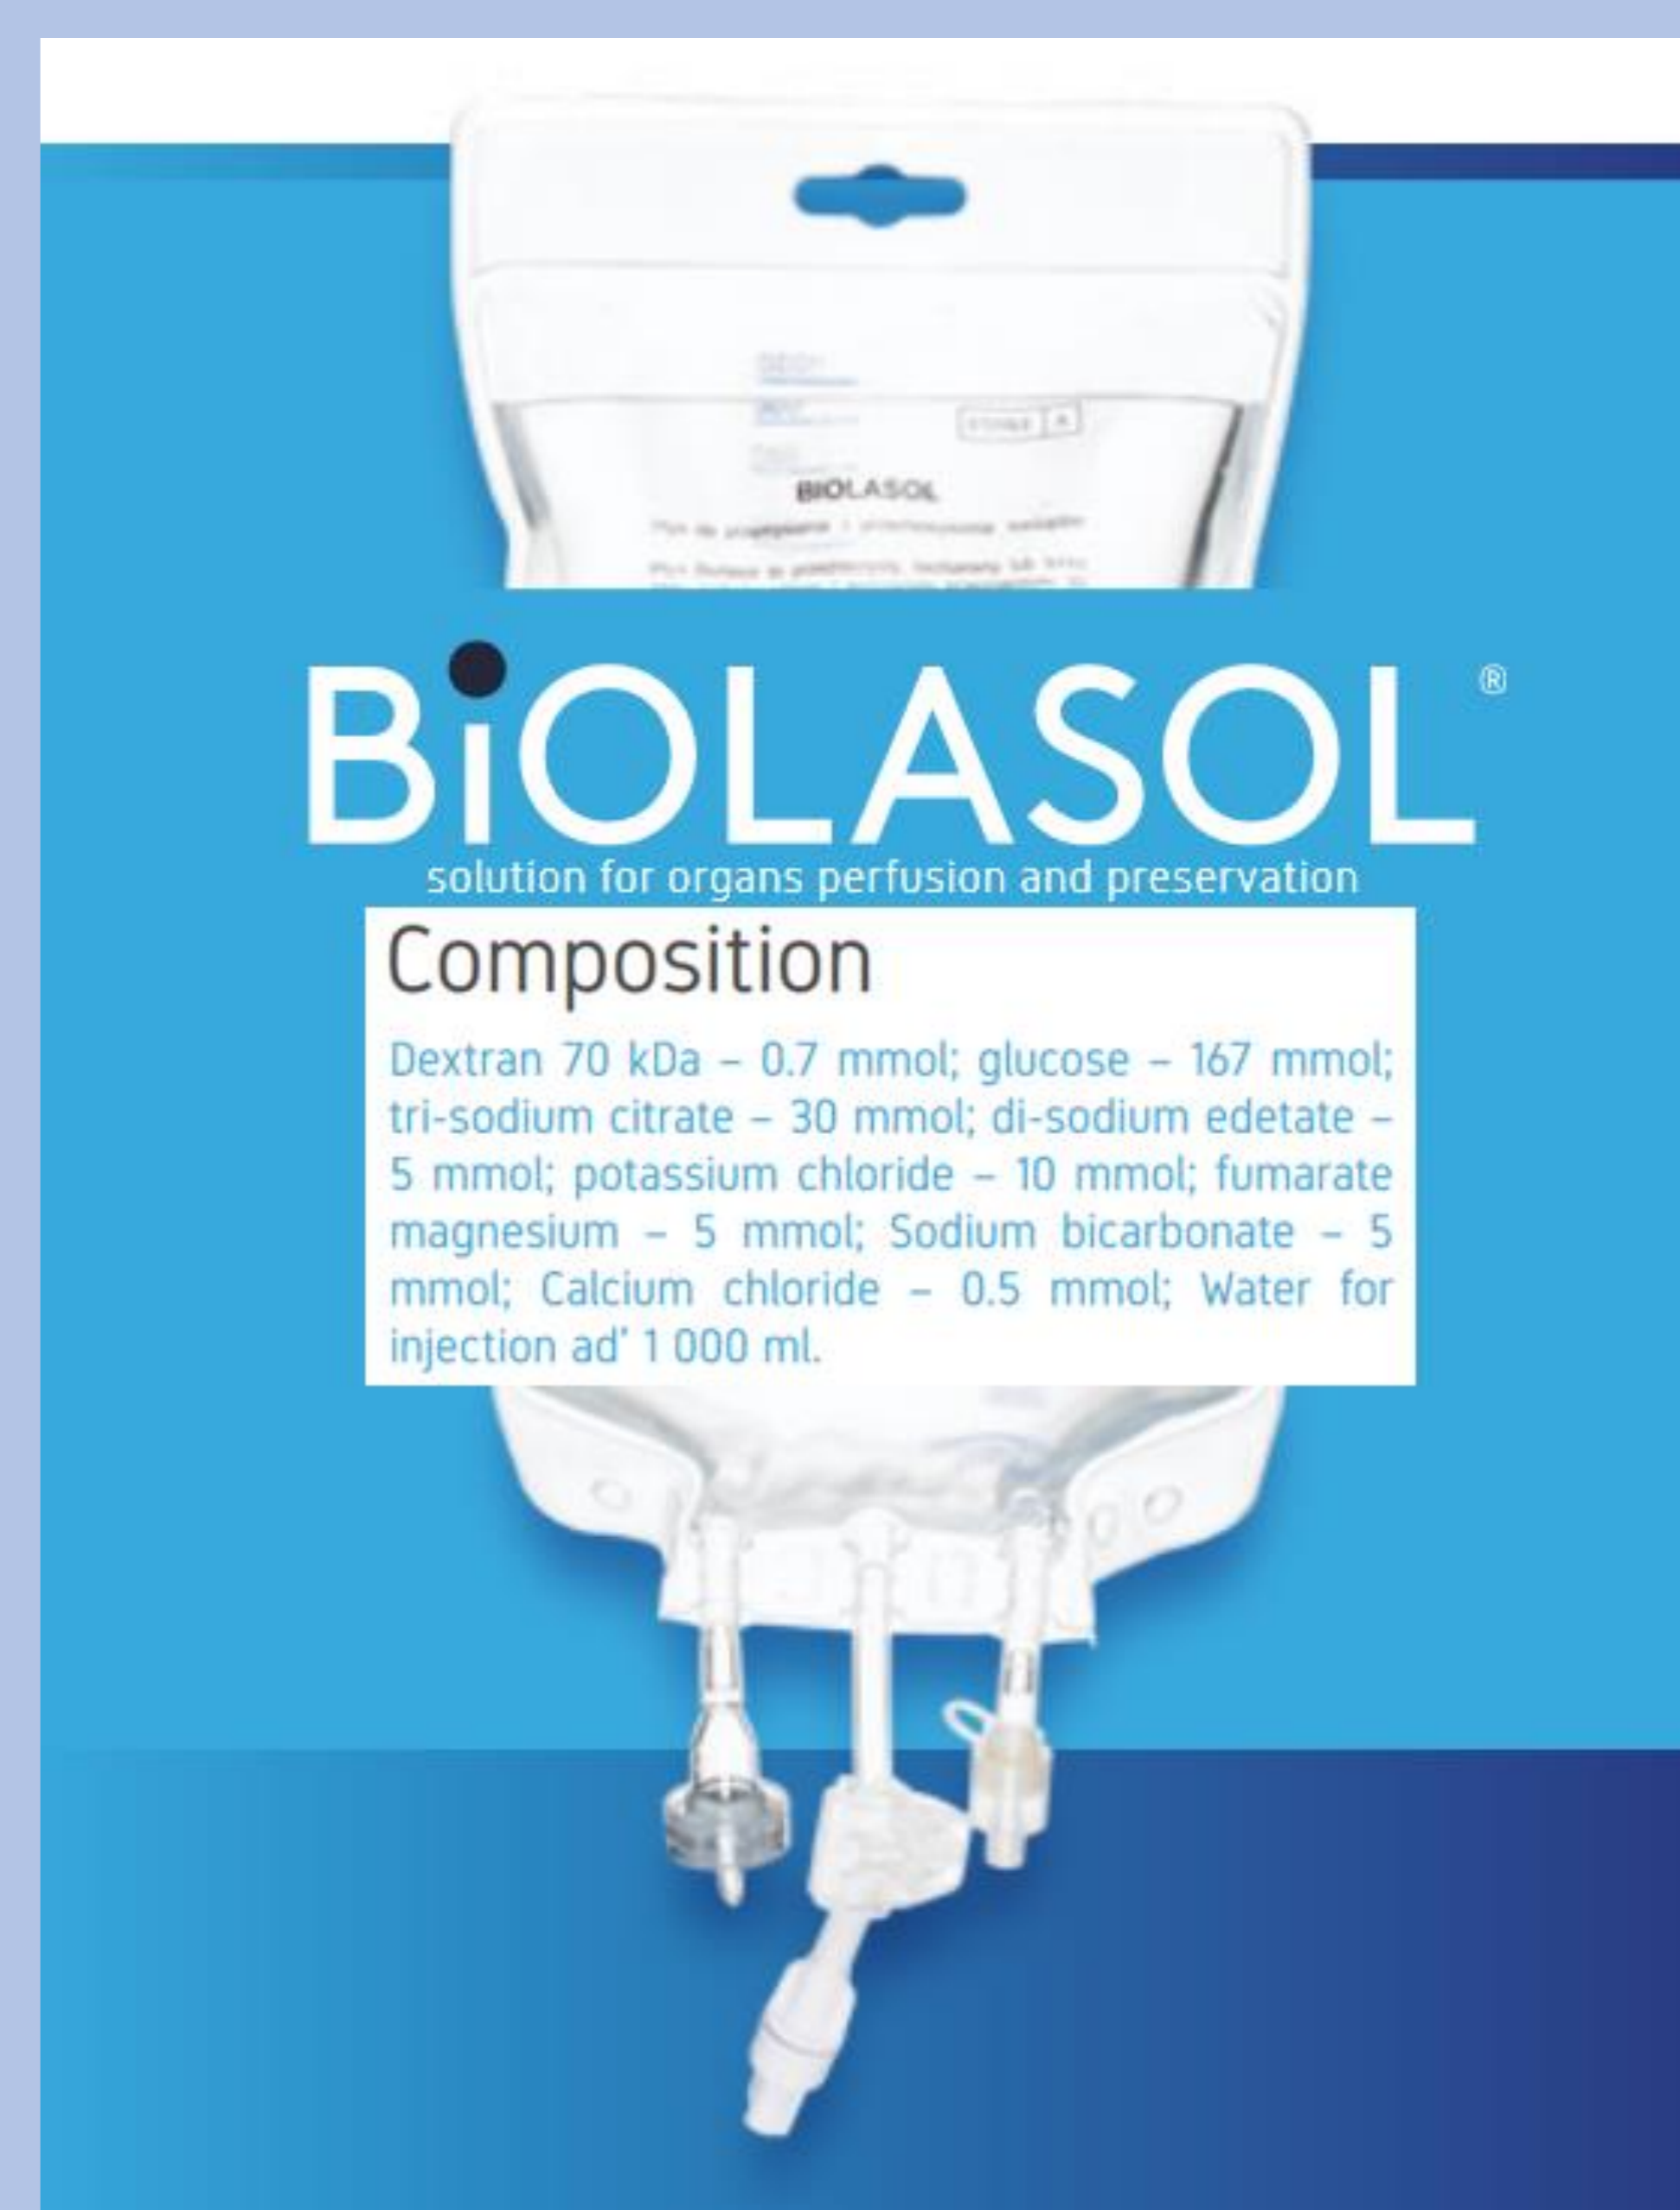

## 5. Conclusion

The simultaneous introduction of  $Mn^{2+}$  +  $Mg^{2+}$  ions into the Biolasol composition improved renal function indices. The bioelements showed a protective effect.

## 6. Acknowledgements

The research was financed by the Medical University of Silesia in Katowice (grant No. PCN-1- 043/N/1/F).

## 7. References

- Ostróżka-Cieślik A, Dolińska B, Ryszka F. *Effect of Manganese on the Efficacy of Preservative Solution in Protecting Isolated Porcine Kidneys*. *Transplant Proc.* 2022 May;54(4):874-877. doi: 10.1016/j.transproceed.2022.02.042.
- Ostróżka-Cieślik, A. *The Effect of Antioxidant Added to Preservation Solution on the Protection of Kidneys before Transplantation*. *Int. J. Mol. Sci.* 2022, 23, 3141. doi.org/10.3390/ijms23063141

## 4. Figures. Biochemical indicators of the function of isolated pig kidneys.

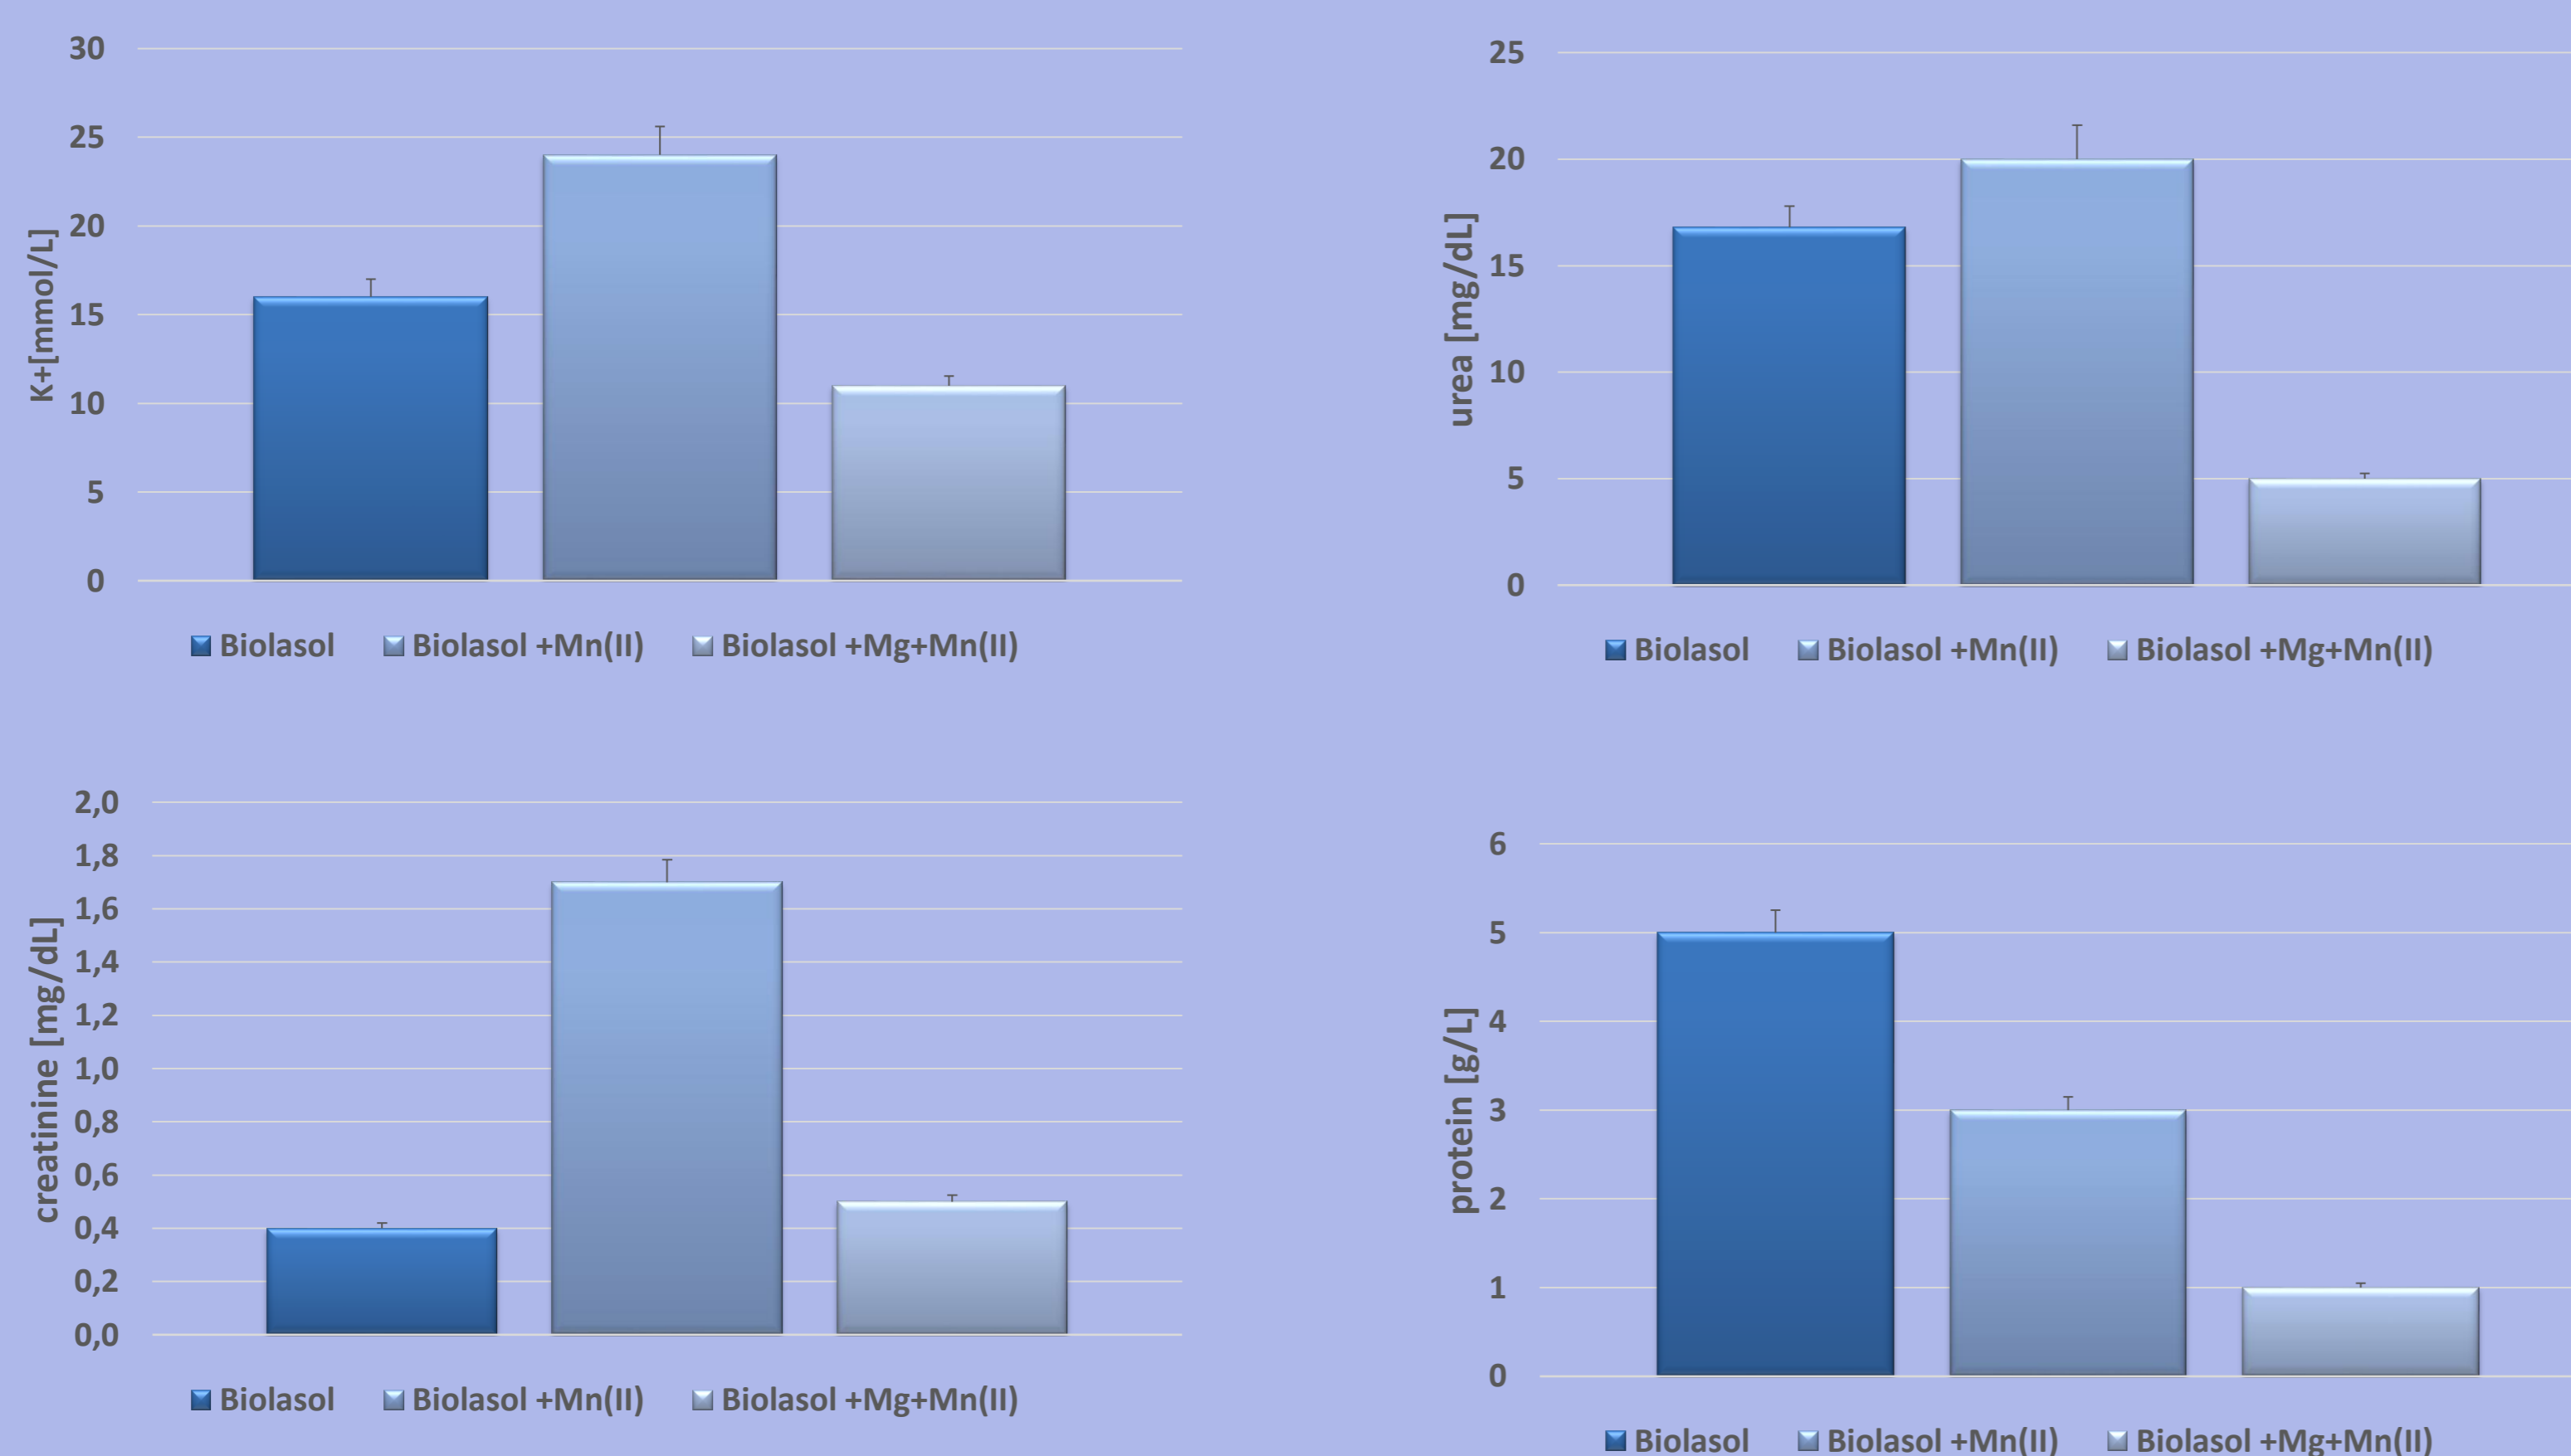

ECMC  
2022

The 8th International Electronic  
Conference on Medicinal Chemistry  
01-30 NOVEMBER 2022 | ONLINE
